# Supplementary material for: BmP02 Atypically Delays Kv4.2 Inactivation: Implication for a Unique Interaction between Scorpion Toxin and Potassium Channel
Source: Toxins (Basel). 2016 Sep 27;8(10):280. doi: 10.3390/toxins8100280 (PMC5086640; doi:10.3390/toxins8100280)
Supplement: Supplementary file 1 [file toxins-08-00280-s001.pdf]

# Supplementary Materials: BmP02 Atypically Delays Kv4.2 Inactivation: Implication for a Unique Interaction Between Scorpion Toxin and Potassium Channel

Bin Wu, Yan Zhu, Jian Shi, Jie Tao and Yonghua Ji

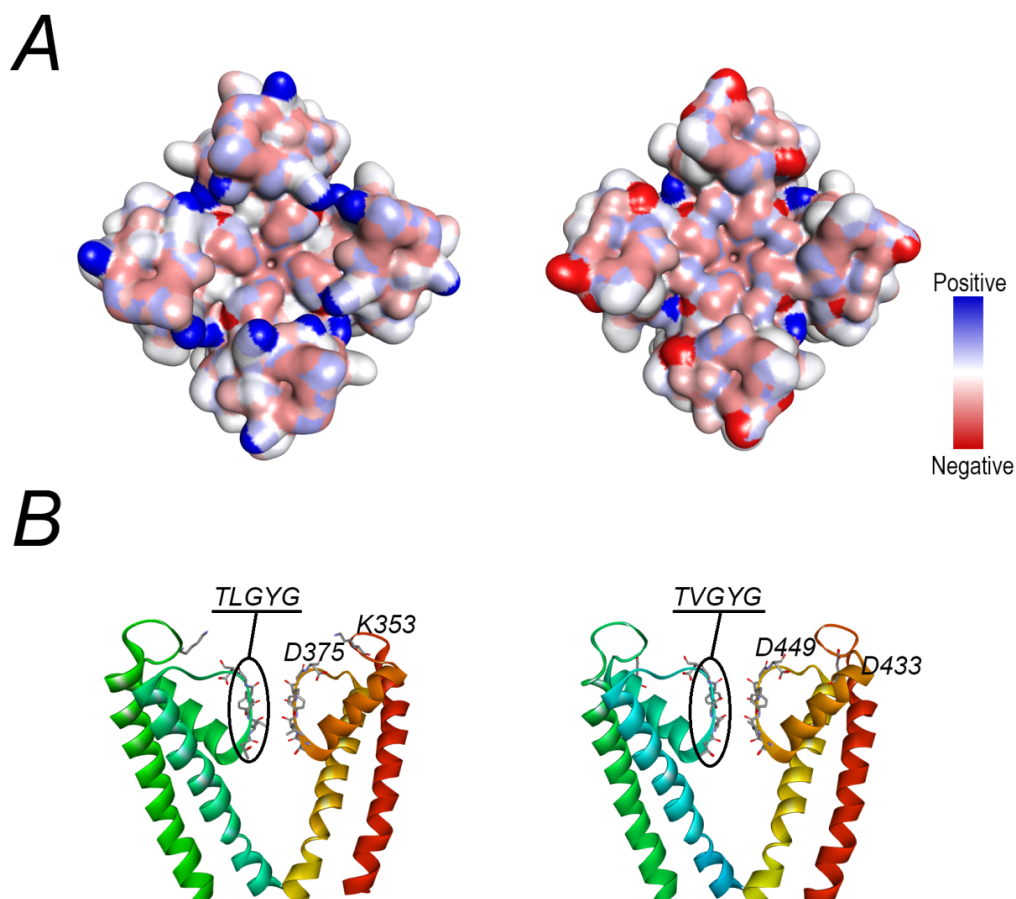

**Figure S1.** Homology modeling of Kv4.2 and Kv1.3 using the structure of KcsA (PDB: 1BL8) as template. **(A)** A vertical view of Kv4.2 (left) and Kv1.3 (right). The positively charged groups are shown in blue and the negatively charged groups are in red; **(B)** An insight into the structure of Kv4.2 (left) and Kv1.3 (right). Residues in the selectivity filter and a Asp nearby are highlighted. K<sub>353</sub> in Kv4.2 and D433 (the corresponding residue of A<sub>359</sub> in Kv4.2) in Kv1.3 are also highlighted.

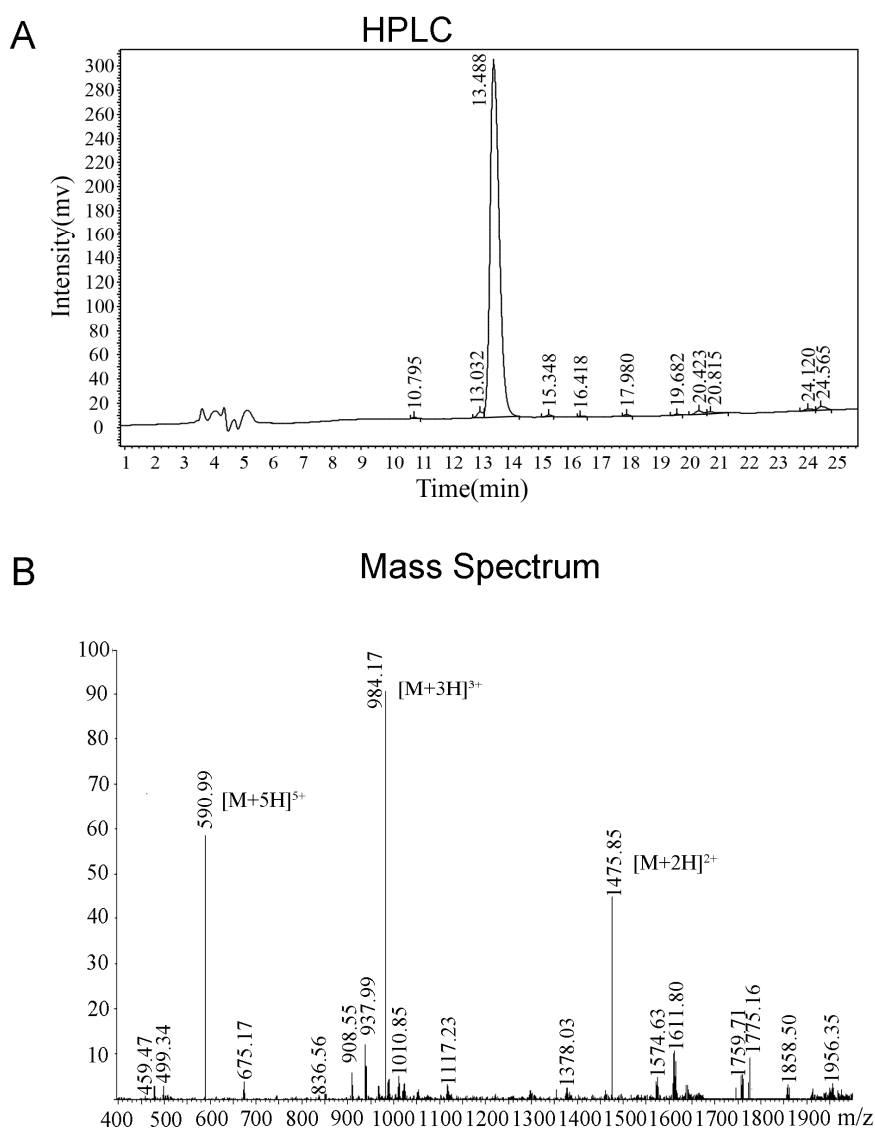

**Figure S2.** The purity and the molecular weights of synthetic BmP02. **(A)** Purity of synthetic BmP02 was determined by High Performance Liquid Chromatography (HPLC); **(B)** Molecular weights of the peptides were determined by mass spectrum (MS).

**Table S1.** The primers used in the construction of mutants. The mutated sites are underlined. S: sense, A: anti-sense.

| Name    | Mutated Sites                                            | Primer                                                                                                                                      |
|---------|----------------------------------------------------------|---------------------------------------------------------------------------------------------------------------------------------------------|
| Kv4.2M1 | A <sub>359</sub> D                                       | S:5'-CAGCATCCCTGACGCCTTCTGGTATACCATCGT<br>A:5'-GGTATACCAGAAGGCGTCAGGGATGCTGCTGAA                                                            |
| Kv4.2M2 | K <sub>347</sub> A/K <sub>353</sub> G                    | S:5'-GCGGGGTCTTCGGCTAGCGGGTTCACCAGCATCCCT<br>A:5'-CCCGCTAGCCGAAGACCCCGCTCTGCGTAGAACAT                                                       |
| Kv4.2M3 | K <sub>347</sub> A/K <sub>353</sub> G/A <sub>359</sub> D | S:5'-GCGGGGTCTTCGGCTAGCGGGTTCACCAGCATCCCTGACGCCTTCTGGTA<br>TACCATCGT<br>A:5'-GTCAGGGATGCTGGTGAACCCGCTAGCCGAAGACCCCGCTCTGCGTAG<br>AACATAACTG |
